# Supplementary material
Source: HighWire-hosted journal article supplement (https://ard.bmj.com/content/76/10/1648)
Supplement: inline-supplementary-material-7 [file inline-supplementary-material-7.docx]

| **Table 1: Primer sequences and PCR conditions *** | | | | |  |
| --- | --- | --- | --- | --- | --- |
|  |  |  |  |  |  |
| Exon | Primers sequence 5' -> 3' | | | Size (bp) | Mg2+ [mM] |
| 2 | F: TCCATCTGAGCCCTTTCCTA | | | 377 | 1,5 |
| R: CCACCCCTTTCCAAACCTTA | | |
| 3 | F: TTCACCCCTTTGTCTTCACC | | | 291 | 1,5 |
| R: CTGGGACATGTGCTTTCTGA | | |
| 4 | F: ATGCAAGGTGGGTAGCAGTC | | | 329 | 1,5 |
| R: TGGGAGGAACAGAGAGGAGA | | |
| 5 | F: TCCTGGTTGTGCTTTCTTCC | | | 182 | 1,5 |
| R: ACCCGAGCTTTTCAGCAATA | | |
| 6 | F: GCACTGTCTCCTGGCTTCTC | | | 162 | 2,0 |
| R: CTTAACAGGCAGCCCTTCTG | | |
| 7 | F: ACCTCCCTGTCCCTCTCTGT | | | 188 | 1,5 |
| R: AGCTCTCCCATTGACCACCT | | |
| 8 | F: GAAGACCATTCCCGTGTGTT | | | 207 | 1,5 |
| R: GGATTAGCCACATGGGTCAC | | |
| 9 | F: GGCTCAAGGTCTCACCTCAC | | | 306 | 2,0 |
| R: CTGGGAGGACACAGGACACT | | |
| 10 | F: TGCTCTGCAAGGCTCTAATG | | | 324 | 1,5 |
| R: CAGCCAAGTGCTTCTCACAG | | |

*Reactions were set up with a mix of 100 ng DNA, dNTPs at 200 µM each, Mg2+ (see table 1), Primers F/R at 1.0 pM each. Thermocycling conditions were performed (as reported in Material and Methods) at 60°C Ta for each exon.
